# Supplementary material
Source: HighWire-hosted journal article supplement (https://jnm.snmjournals.org/highwire/filestream/94001/field_highwire_adjunct_files/0/jnm058966_Supplemental_Figures.pdf)
Supplement: jnm058966_Supplemental_Figures.pdf [file jnm058966_Supplemental_Figures.pdf]

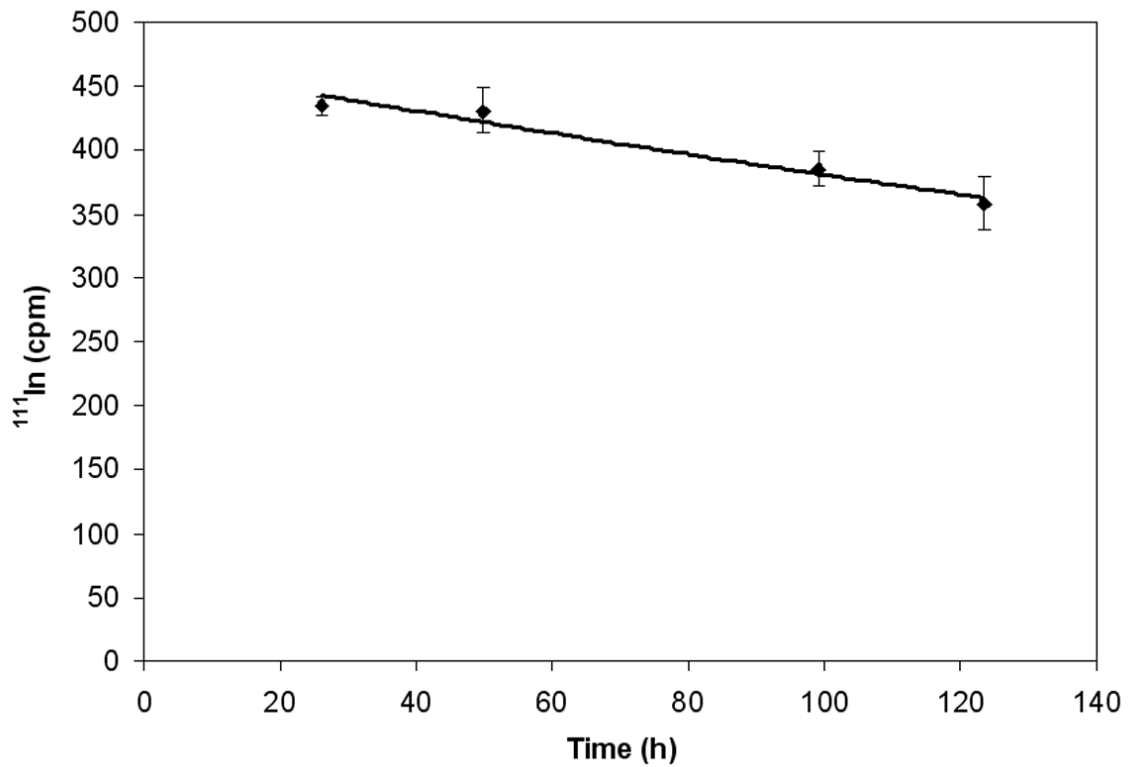

Supplemental Figure 1. *In vitro* retention of <sup>111</sup>In in canine BMSCs as evaluated by gamma camera imaging. Biological half-life of <sup>111</sup>In in BMSCs was calculated to be 14.1 days ( $r^2=0.96$ ).

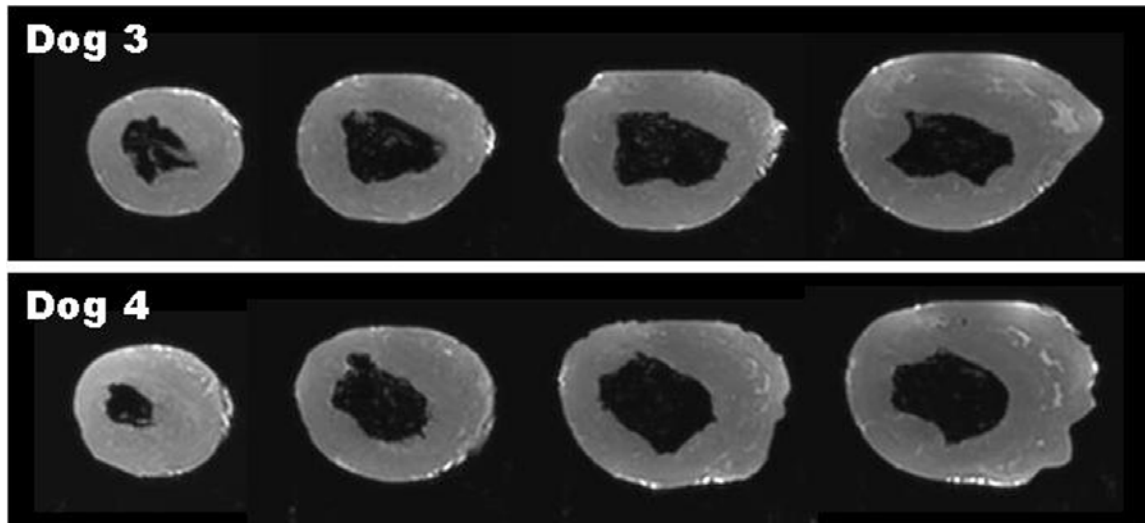

Supplemental Figure 2. *Ex vivo* magnetic resonance images of canine myocardium 3 weeks after injection of free  $^{111}\text{In}$ -tropolone. Gd-DTPA was injected with a bolus (0.2 mmol/kg) followed by a constant infusion (0.004 mmol/kg/min) ~60 minutes prior to sacrifice after which the heart was excised and imaged immediately at 1.5T (Avanto, Siemens Medical Solutions, Erlangen Germany) using a high resolution 3D FLASH sequence (TR/TE 22/10 msec,  $40^\circ$  flip angle, in-plane resolution 0.39 to 0.59 mm, slice thickness 1 mm). Shown are short axis slices taken from within the injection area (distal to 1<sup>st</sup> diagonal branch of LAD).
